# Supplementary material for: 230 Th/U Isochron Dating of Cryogenic Cave Carbonates
Source: Copernicus journal article supplement (doi:10.5194/gchron-2022-10), 2022-03-29
Supplement: Supplementary file 1 [file gchron-2022-10-supplement.pdf]

Supplementary Material

$^{230}\text{Th}/\text{U}$  Isochron Dating of Cryogenic Cave Carbonates

Paul Töchterle<sup>1</sup> et. al

Correspondence to: Paul Töchterle ([paul.toechterle@uibk.ac.at](mailto:paul.toechterle@uibk.ac.at))

5

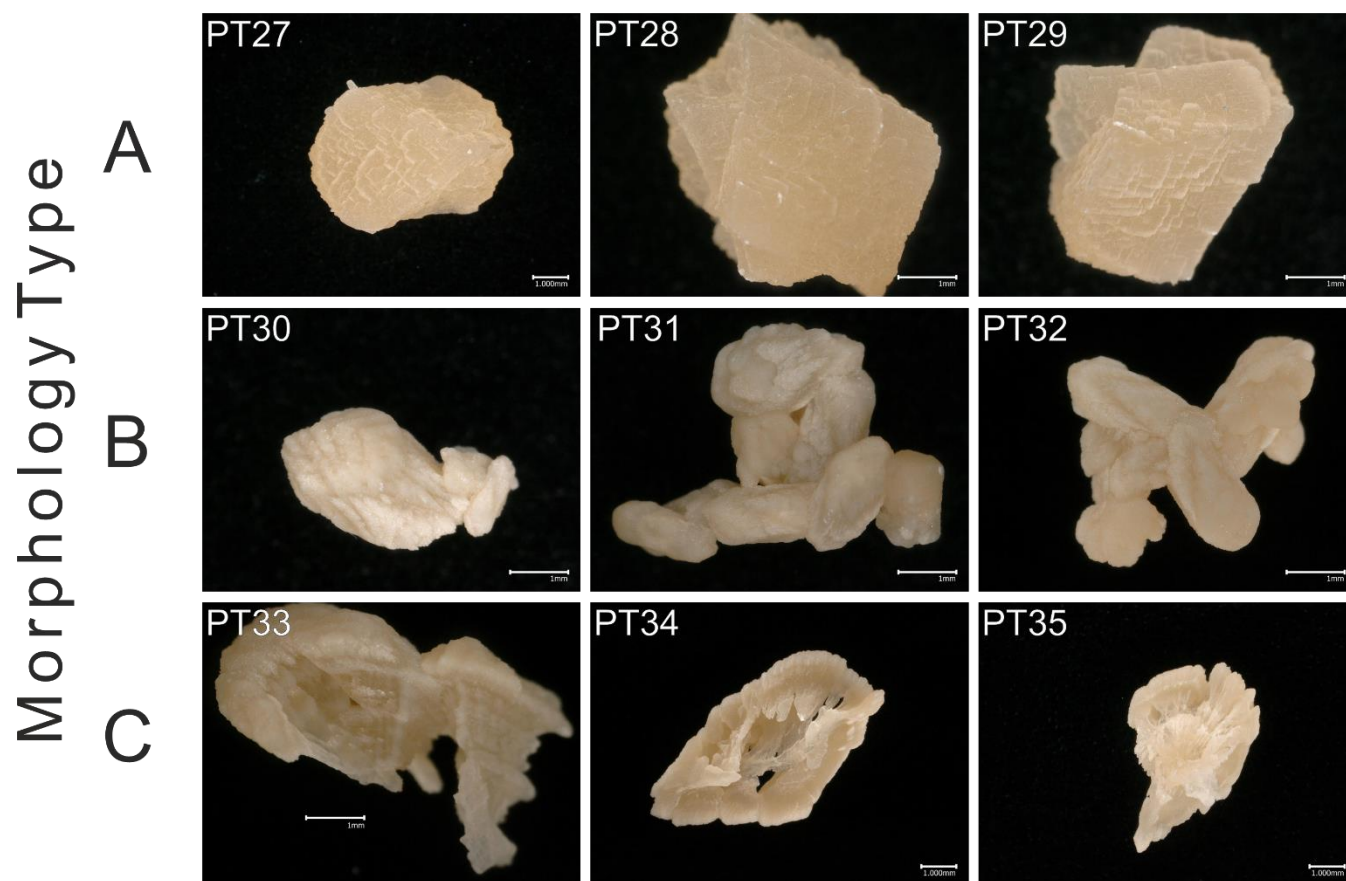

Figure S1

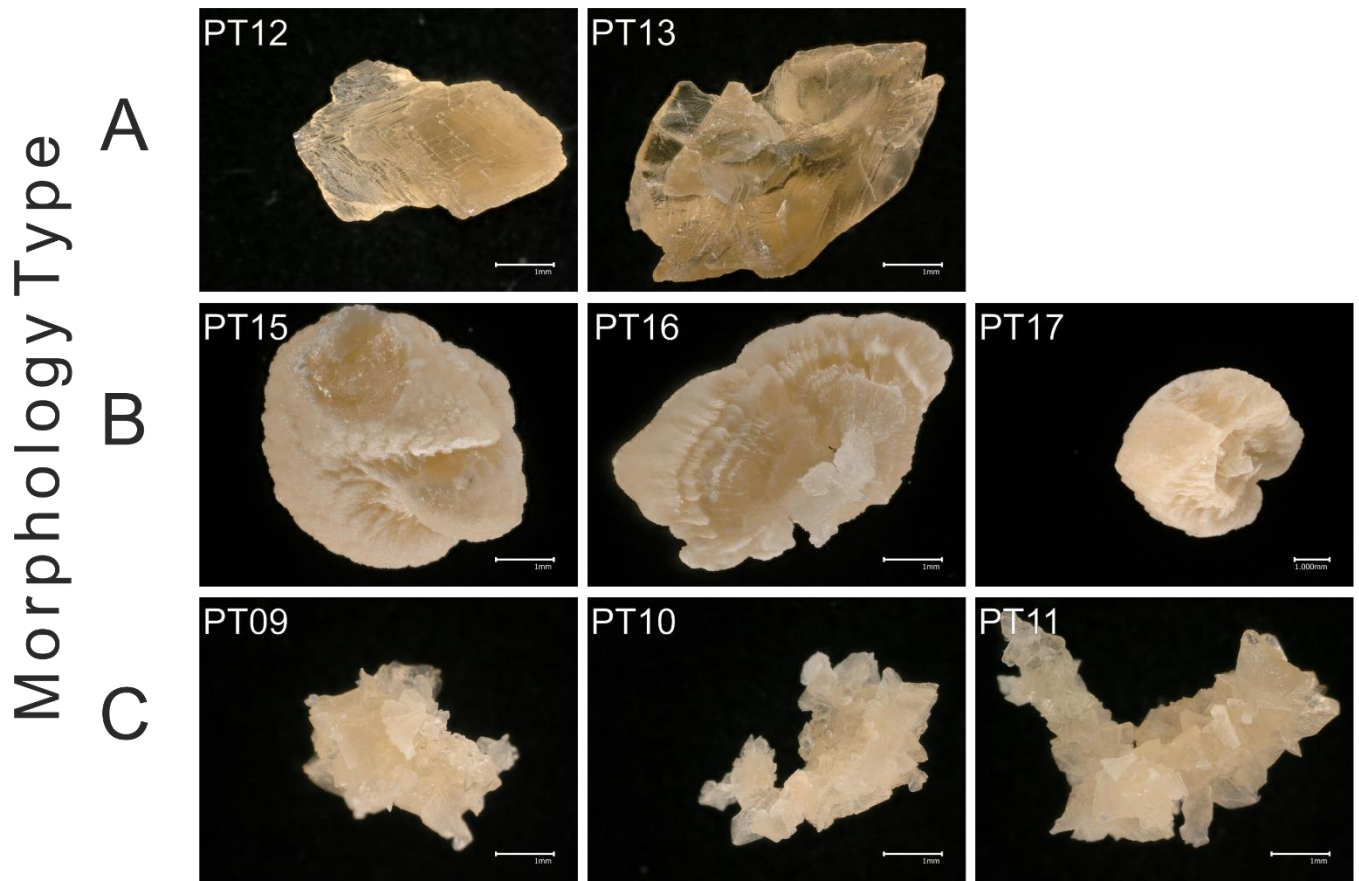

Figure S2

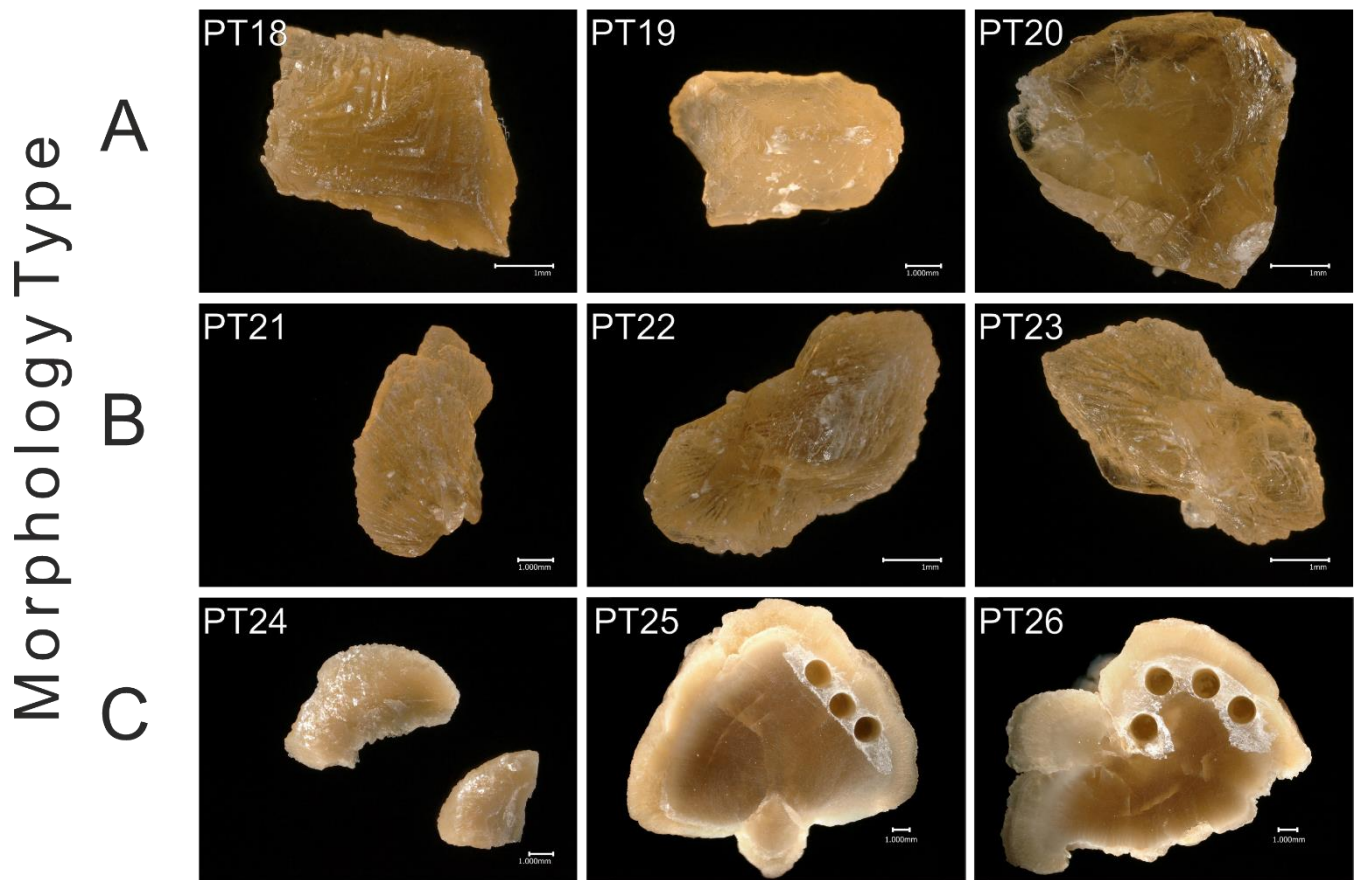

Figure S3

**Table S1: Age and regression parameters of isochrons. Explanation of uncertainty ranges are given in the methods section of the main text.**

| ID   | n | R <sup>2</sup> | p                     | ( <sup>230</sup> Th/ <sup>238</sup> U) | δ <sup>234</sup> U <sub>0</sub> | ( <sup>230</sup> Th/ <sup>232</sup> Th) <sub>0</sub> | Age [BCE]  |
|------|---|----------------|-----------------------|----------------------------------------|---------------------------------|------------------------------------------------------|------------|
| r1.1 | 9 | 0.98           | 7.1 *10 <sup>-6</sup> | 0.1600 ±0.0031                         | 509.9 ±1.8                      | 2.7 ±0.2                                             | 12224 ±478 |
| r1.2 | 8 | 0.997          | 5.0*10 <sup>-8</sup>  | 0.1554 ±0.0010                         | 507.6 ±1.2                      | 3.4 ±0.1                                             | 11865 ±172 |
| r2.1 | 6 | 0.98           | 6.0*10 <sup>-4</sup>  | 0.2077 ±0.0007                         | 1076.6 ±0.8                     | 7.3 ±0.7                                             | 11524 ±85  |
| r3.1 | 6 | 0.89           | 0.02                  | 0.3783 ±0.0004                         | 170.1 ±0.8                      | 4.2 ±1.1                                             | 43065 ±139 |
| r3.2 | 3 | 0.9991         | 0.03                  | 0.3731 ±0.0004                         | 169.14 ±0.04                    | 5.4 ±0.2                                             | 42297 ±109 |
